# Supplementary material for: An early evaluation of clinical and economic costs and benefits of implementing point of care NAAT tests for Chlamydia trachomatis and Neisseria gonorrhoea in genitourinary medicine clinics in England
Source: HighWire-hosted journal article supplement (doi:10.1136/sextrans-2013-051147), 2013-11-22
Supplement: sextrans-2013-051147supp.pdf [file sextrans-2013-051147supp.pdf]

**APPENDIX**

**Table A1** Illustrative number of infections, patients with symptoms and treatments in the model. These values accompany Figure 1 in the main text. (Note – the specific numbers used in the main text may differ somewhat this is just for illustration of the pathway influence diagram.)

| Results                                                                 | Men    | Women  |
|-------------------------------------------------------------------------|--------|--------|
| <b>Number of screens</b>                                                | 10,000 | 10,000 |
| <b>Number of chlamydia infections</b>                                   | 860    | 740    |
| <b>Number of gonorrhoea infections</b>                                  | 250    | 90     |
| <b>Number symptomatic</b>                                               | 3,500  | 4,800  |
| <b>Number asymptomatic</b>                                              | 6,500  | 5,200  |
| <b>Number chlamydia treated presumptively (infected + symptomatic)</b>  | 287    | 137    |
| <b>Number gonorrhoea treated presumptively (infected + symptomatic)</b> | 161    | 27     |
| <b>Number chlamydia overtreatment (uninfected but symptomatic)</b>      | 155    | 226    |
| <b>Number gonorrhoea overtreatment (uninfected but symptomatic)</b>     | 66     | 95     |
| <b>Chlamydia treatment (on test result)</b>                             | 573    | 603    |
| <b>Gonorrhoea treatment (on test result)</b>                            | 99     | 63     |
| <b>Proportion of treatment which is overtreatment (chlamydia)</b>       | 15.2%  | 23.4%  |
| <b>Proportion of treatment which is overtreatment (gonorrhoea)</b>      | 20.4%  | 51.4%  |
| <b>Proportion of treatment which is overtreatment (combined)</b>        | 16.5%  | 27.9%  |

### Calculation of overtreatment

Several presenting conditions are managed syndromically using chlamydia treatment and sometimes gonorrhoea treatment depending on clinical findings or microscopy. We present additional GUMCAD data here. We made assumptions about the fraction of non-specific genital tract infection (NSGI), pelvic inflammatory disease (PID) and epididymitis, which are treated presumptively for chlamydia and gonorrhoea but where infection is not present.

**Table A2** Calculation of overtreatment

| Presenting condition                                                                                                                                                                                   | Men    | Women  |                        |
|--------------------------------------------------------------------------------------------------------------------------------------------------------------------------------------------------------|--------|--------|------------------------|
| <b>A</b> Non-specific genital infections                                                                                                                                                               | 54,324 | 7,594  | GUMCAD 2011 Table 5[1] |
| <b>B</b> Pelvic inflammatory disease & epididymitis                                                                                                                                                    | 6,429  | 15,768 | GUMCAD 2011 Table 5[1] |
| <b>C</b> Chlamydial pelvic inflammatory disease                                                                                                                                                        | 502    | 1,768  | GUMCAD 2011 Table 5[1] |
| <b>D</b> Gonorrhoea pelvic inflammatory disease                                                                                                                                                        | 98     | 210    | GUMCAD 2011 Table 5[1] |
| <b>E</b> PID excluding chlamydial pelvic inflammatory disease                                                                                                                                          | 5,927  | 14,000 | B-C                    |
| <b>F</b> PID excluding gonococcal pelvic inflammatory disease                                                                                                                                          | 6,331  | 15,558 | B-D                    |
| <b>G</b> Number of symptomatic patients (with non-specific genital tract infection or pelvic inflammatory disease) who are not infected with chlamydia but who would receive treatment for chlamydia   | 60,251 | 21,594 | =I*A+J*E               |
| <b>H</b> Number of symptomatic patients (with non-specific genital tract infection or pelvic inflammatory disease) who are not infected with gonorrhoea but who would receive treatment for gonorrhoea | 3,033  | 9,715  | =K*A+L*E               |
| <b>I</b> Proportion of NSGI that get treated for chlamydia                                                                                                                                             | 100%   | 100%   | Guidelines[2,3]        |
| <b>J</b> Proportion of PID that get treated for chlamydia                                                                                                                                              | 100%   | 100%   | Guidelines[2,3]        |
| <b>K</b> Proportion of NSGI that get treated for gonorrhoea                                                                                                                                            | 5%     | 5%     | Assumption             |
| <b>L</b> Proportion of PID that get treated for gonorrhoea                                                                                                                                             | 5%     | 60%    | Assumption             |

\* NSGI - Non-specific genital tract infection, PID – pelvic inflammatory disease

**Table A3** Additional scenario analyses

| Scenario            |               | BASELINE                                       | 6 Higher prevalence        | 7 Lower proportion treated presumptively | 8 Higher proportion treated presumptively | 9 Long time to treat | 10 Lower QALYs                                      | 11 Lower proportion symptomatic | 12 Higher proportion symptomatic | 13 Increase relative risk of symptomatics | 14 No presumptive treatment | 15 Increase relative risk of symptomatics presumptive treatment |
|---------------------|---------------|------------------------------------------------|----------------------------|------------------------------------------|-------------------------------------------|----------------------|-----------------------------------------------------|---------------------------------|----------------------------------|-------------------------------------------|-----------------------------|-----------------------------------------------------------------|
|                     |               | CT=3.6%, 7.4%<br>NG=2.5%, 0.9%<br>Sympt=5%, 8% | Double baseline prevalence |                                          | 100% presumptive treatment                | Rx time=21 days      | 25% lower symptoms/positive diagnosis/complications | 15%, 20%                        |                                  |                                           |                             |                                                                 |
| Standard Care       | Cost          | £15,627,887                                    | £20,833,130                | £12,865,267                              | £15,651,162                               | £15,654,528          | £15,627,887                                         | £10,497,195                     | £27,415,395                      | £15,569,091                               | £11,396,310                 | £11,397,425                                                     |
|                     | QALY          | 84,012                                         | 83,966                     | 84,027                                   | 84,012                                    | 84,011               | 83,885                                              | 84,038                          | 83,971                           | 84,013                                    | 84,056                      | 84,056                                                          |
|                     | Transmissions | 7,561                                          | 4,882                      | 6,319                                    | 7,648                                     | 3,383                | 7,561                                               | 7,981                           | 7,256                            | 7,582                                     | 8,439                       | 8,439                                                           |
|                     | PID           | 223                                            | 21                         | 221                                      | 223                                       | 89                   | 223                                                 | 225                             | 219                              | 242                                       | 90                          | 200                                                             |
| Overtreatment       | 95,382        | 5,605                                          | 71,524                     | 95,382                                   | 95,382                                    | 95,382               | 95,382                                              | 40,073                          | 183,161                          | 93,628                                    | 81                          | 71                                                              |
| Point of Care       | Cost          | £103,873,872                                   | £108,716,604               | £103,873,872                             | £103,873,872                              | £103,873,872         | £103,873,872                                        | £98,998,214                     | £110,679,468                     | £103,873,668                              | £103,874,165                | £103,874,164                                                    |
|                     | QALY          | 84,059                                         | 84,008                     | 84,059                                   | 84,059                                    | 84,059               | 83,986                                              | 84,059                          | 84,059                           | 84,059                                    | 84,059                      | 84,059                                                          |
|                     | Transmissions | 7,561                                          | 4,882                      | 6,319                                    | 7,648                                     | 3,383                | 7,561                                               | 7,981                           | 7,256                            | 7,582                                     | 8,439                       | 8,439                                                           |
|                     | PID           | 223                                            | 21                         | 221                                      | 223                                       | 89                   | 223                                                 | 225                             | 219                              | 242                                       | 90                          | 200                                                             |
| Overtreatment       | 95,382        | 5,605                                          | 71,524                     | 95,382                                   | 95,382                                    | 95,382               | 95,382                                              | 40,073                          | 183,161                          | 93,628                                    | 81                          | 71                                                              |
| Difference (POC-SC) | Cost          | -£1,754,015                                    | -£2,116,526                | -£8,991,395                              | -£1,777,290                               | -£1,780,656          | -£1,754,015                                         | -£8,498,981                     | -£6,735,928                      | -£1,695,422                               | -£7,522,146                 | -£7,523,261                                                     |
|                     | QALY          | 46                                             | 41                         | 32                                       | 47                                        | 47                   | 102                                                 | 21                              | 88                               | 46                                        | 2                           | 2                                                               |
|                     | Transmissions | -17,561                                        | -34,882                    | -16,319                                  | -17,648                                   | -33,383              | -17,561                                             | -17,981                         | -17,256                          | -17,582                                   | -18,439                     | -18,439                                                         |
|                     | PID           | -189                                           | -353                       | -187                                     | -189                                      | -354                 | -189                                                | -190                            | -186                             | -209                                      | -154                        | -164                                                            |
| Overtreatment       | -95,382       | -85,605                                        | -71,524                    | -95,382                                  | -95,382                                   | -95,382              | -40,073                                             | -183,161                        | -93,628                          | -81                                       | -71                         |                                                                 |

**Table A4** Partner pathway results for those currently treated epidemiologically as contacts of infected individuals.

| <b>Proportion of partners infected</b> | <b>20%</b> | <b>40%</b> | <b>60%</b> |
|----------------------------------------|------------|------------|------------|
| <b>Standard care *</b>                 | £1,715,246 | £1,715,246 | £1,715,246 |
| <b>POCT</b>                            | £773,157   | £954,061   | £1,134,965 |
| <b>Overtreatment**</b>                 | 12,224     | 9,168      | 6,112      |

\*In Standard Care pathway all partners are given treatment so the costs remain the same regardless of the proportion of partners infected.

\*\*Number based on 15,280 individuals reported as receiving epidemiological treatment for either gonorrhoea (1,405 M, 755 F) or chlamydia (7,921 M, 5,199 F) in GUMCAD 2011[1],

Appendix Figure A1 Sensitivity analysis varying the cost of the new POC NAAT test on the total cost of chlamydia and gonorrhoea testing and treatment in GUM clinics in England

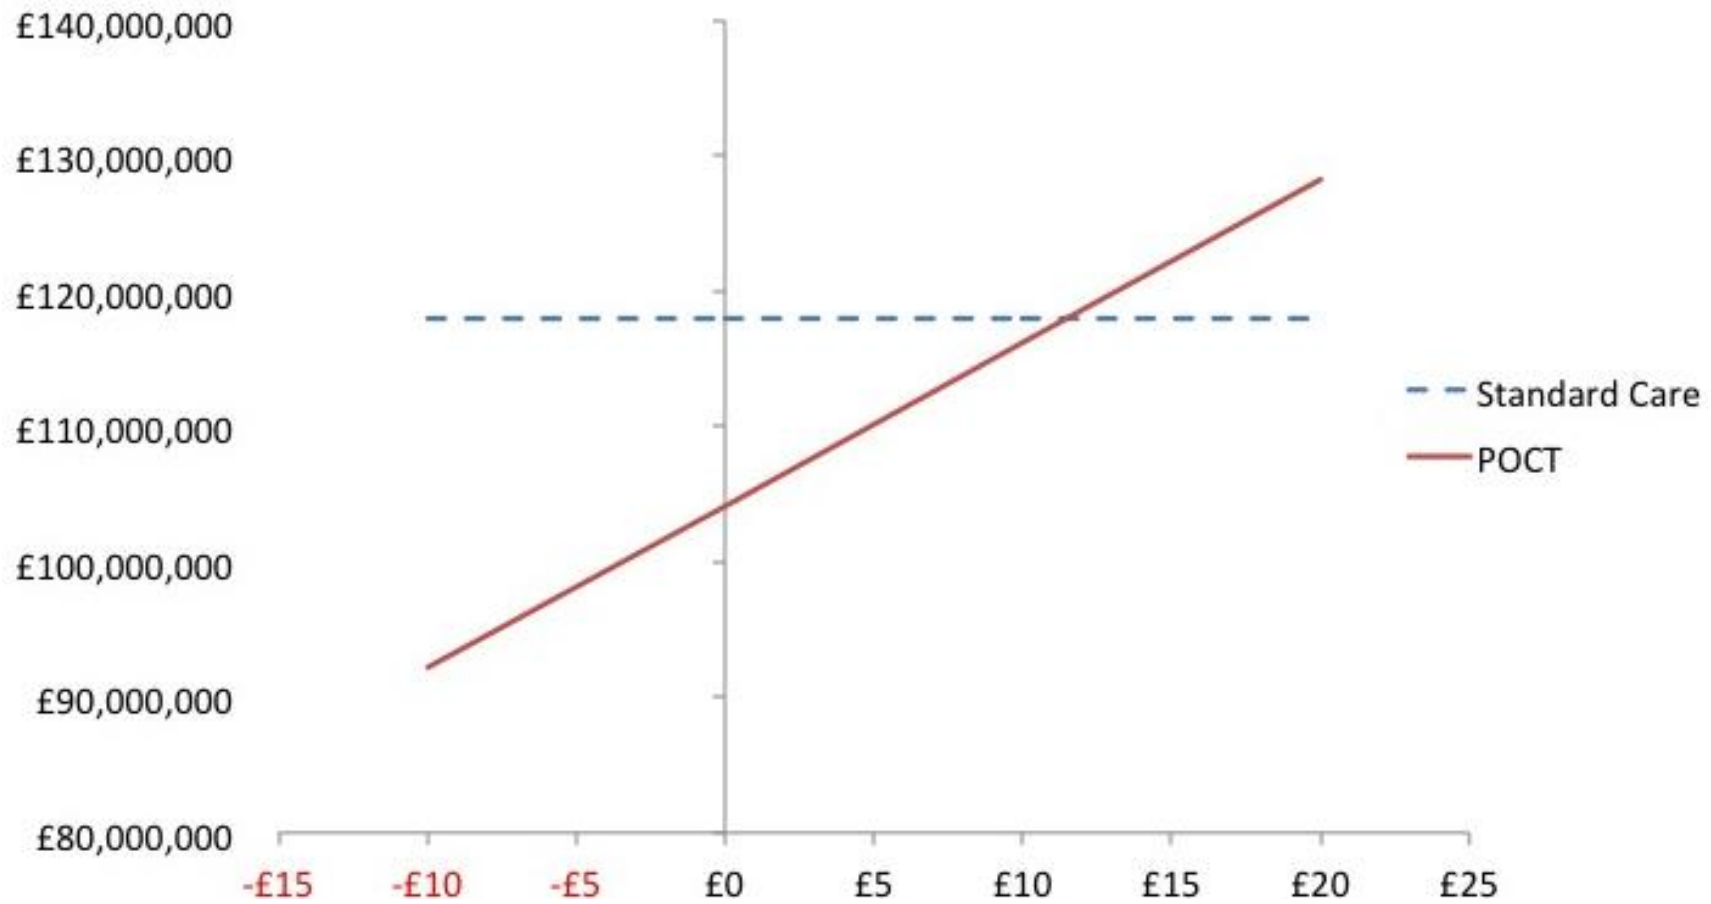

*Further description and discussion of presumptive and epidemiological treatment*

*Presumptive treatment* (in the presence of signs or symptoms, also called syndromic management)

In clinical practice there are several reasons why treatment is often given presumptively based on symptoms: high likelihood of infection (i.e. appropriate management, which is reflected in clinical guidelines for management of certain conditions), desire to manage symptoms, unwillingness to leave treatable infections untreated, belief that the treatment is also effective against other infections, concern about patients returning for results, and prevention of onward transmission of infection.

The definition of symptoms is not clear and we used data from MSTIC to estimate the proportion of those attending GUM who are symptomatic. This may be identified by the patient and be the reason for attendance, or elicited through questions on attendance (paper, computer or face to face), and that would be examined by a clinician. This process varies from clinic to clinic. We distributed infections between these groups according to the relative proportions (but not absolute prevalence) observed in MSTIC. This includes all patients reporting any symptoms, not just those due to CT/NG.[4] These patients are assigned costs associated with the symptomatic pathway, i.e. including an examination. These proportions may not be representative of the overall attendance patterns at GUM and is likely to vary according to clinic population.

In terms of differentiating between the standard care and POC pathways, we pose two distinct questions: what fraction of those *infected* are treated presumptively (correctly) and what fraction of those *uninfected* are treated presumptively (incorrectly, or overtreatment).

*Correct presumptive treatment* (treatment of infection based on symptoms and signs, prior to confirmation by lab diagnosis)

The proportion of infected individuals who are managed appropriate at their first attendance should be maximised. If the proportion of infections correctly managed is close to 100% then there is little or no benefit to these patients of a diagnostic test as they are managed effectively based on their presentation. However, symptoms may have multiple causes and are not very specific or sensitive for making a correct diagnosis especially for

chlamydia and in women. The proportion assumed correctly treated varied from 24% for chlamydia in women to 90% for men with gonorrhoea (Table 1). A substantial proportion of infections are not diagnosed on presentation but instead treatment is delayed until results are received (as in the asymptomatic pathway).

*Incorrect presumptive treatment (overtreatment, in the presence of symptoms indicative of infection)*

Ideally the proportion of attendees who are not infected but do receive presumptive treatment should be minimised. We used the number of diagnoses in GUMCAD for non-specific genital infection, non-CT/NG epididymitis and non-CT/NG PID as a proxy measure of the fraction of uninfected symptomatic individuals presumptively treated (Table 1 and Appendix). The management of these conditions typically includes chlamydia treatment and occasionally gonorrhoea treatment.[5-7] This yielded estimates of overtreatment in uninfected symptomatic patients of 2% and 3% for gonorrhoea and 33% and 8% for chlamydia, in men and women, respectively. There are limitations to this approach as we do not know whether all the diagnoses did in fact result in presumptive chlamydia treatment. This would lead to an overestimation of the amount of overtreatment. Conversely there are other, less common, presenting conditions which might also result in presumptive treatment. This would result in underestimation of overtreatment. To validate the estimates we also calculated the fraction of symptomatic infections which get treated presumptively and also the fraction of all infections which are treated based on symptoms (given in Table 1) as these figures are easier to compare with reported estimates in the literature. These values seem consistent with clinical opinion but are necessarily a summary measure of a complex clinical decision-making process.

*Ineffective or sub-optimal treatment*

Treatment regimens for chlamydia were previously believed to be efficacious against other infections, e.g., *N. gonorrhoea* (?), *Mycoplasma genitalium* or *Ureaplasma urealyticum* (not trichomonas), but this no longer appears to be the case.[2,8-11]. Alternative treatments may be preferred if chlamydia and gonorrhoea can be ruled out e.g. a prolonged course of azithromycin or moxifloxacin, although the latter has a significant adverse event profile.[7,9]

Inappropriate or incorrect treatment of a different infection or a condition with no infectious cause has various clinical and economical drawbacks. Firstly money is wasted on the cost of the initial, ineffective treatment. Secondly patients may not recover from the presenting condition, leading to follow-up consultations and associated costs as well as potentially onward transmission or progression of disease. Thirdly, sub-optimal therapy can drive the evolution of drug resistance. For example, single dose Azithromycin 1g, has been demonstrated to induce macrolide antimicrobial resistance in some *M. genitalium* isolates.[9,12] and might also contribute to development of drug resistant *N. gonorrhoeae* [13]. Finally presumptive treatment may delay access to appropriate treatment since chlamydia/gonorrhoea infection is not ruled out until later. For example a prolonged course of azithromycin may be required for effective treatment of *M genitalium*, or moxifloxacin although the latter has a significant adverse event profile.[2,7,9-11]



REFERENCE LIST

1. Health Protection Agency. STI Data Tables. 2012. [www.hpa.org.uk](http://www.hpa.org.uk).
2. Horner PJ, Boag FC. 2006 UK National Guideline for the Management of Genital Tract Infection with *Chlamydia trachomatis*. British Association of Sexual Health & HIV; 2006.
3. Bignell CJ, FitzGerald M. UK national guideline for the management of gonorrhoea in adults, 2011. *Int J STI AIDS* 2011;**22**:551-47.
4. Aicken CR, Cassell JA, Estcourt CS, et al. Rationale and development of a survey tool for describing and auditing the composition of, and flows between, specialist and community clinical services for sexually transmitted infections. *BMC Health Serv Res* 2011;**11**:30.
5. Shahmanesh M. 2007 UK National Guideline on the Management of Nongonococcal Urethritis, Updated Dec 2008. British Association for Sexual Health and HIV Clinical Effectiveness Group; 2008. <http://www.bashh.org/documents/1955>.
6. street E, Joyce A, Wilson J. 2010 United Kingdom national guideline for the management of epididymo-orchitis. Clinical Effectiveness Group, British Association for Sexual Health and HIV; 2010. <http://www.bashh.org/documents/3546>.
7. Ross J, McCarthy G. UK National Guideline for the Management of Pelvic Inflammatory Disease 2011 (updated June 2011). 1/6/2011. <http://www.bashh.org/documents/3572>.
8. Horner PJ. Azithromycin antimicrobial resistance and genital *Chlamydia trachomatis* infection: duration of therapy may be the key to improving efficacy. *Sex Transm Infect* 2012 Apr;**88**(3):154-6.
9. Manhart LE, Broad JM, Golden MR. *Mycoplasma genitalium*: should we treat and how? *Clin Infect Dis* 2011 Dec;**53 Suppl 3**:S129-S142.
10. Haggerty CL, Taylor BD. *Mycoplasma genitalium*: an emerging cause of pelvic inflammatory disease. *Infect Dis Obstet Gynecol* 2011;**2011**:959816.
11. Schwebke JR, Rompalo A, Taylor S, et al. Re-evaluating the treatment of nongonococcal urethritis: emphasizing emerging pathogens--a randomized clinical trial. *Clin Infect Dis* 2011 Jan 15;**52**(2):163-70.
12. Jensen JS, Bradshaw CS, Tabrizi SN, et al. Azithromycin treatment failure in *Mycoplasma genitalium*-positive patients with nongonococcal urethritis is associated with induced macrolide resistance. *Clin Infect Dis* 2008 Dec 15;**47**(12):1546-53.
13. Health Protection Agency. GRASP 2011 Report: The Gonococcal Resistance to Antimicrobials Surveillance Programme. Health Protection Agency; 2012. [http://www.hpa.org.uk/webc/HPAwebFile/HPAweb\\_C/1317136030908](http://www.hpa.org.uk/webc/HPAwebFile/HPAweb_C/1317136030908).
